# Supplementary material for: New-onset atrial fibrillation during ST-segment elevation myocardial infarction in an Asian population: Predictors, complications, and prognosis
Source: Research Square preprint supplement (doi:10.21203/rs.3.rs-7884387/v1), 2026-01-22
Supplement: Supplementary file 1 [file 2cdc3c2001457583f56fce70.docx]

Supplemental Materials

| **Table S1** Angiographic and procedural characteristics | | | | |
| --- | --- | --- | --- | --- |
| **Variable** | **Total**  **(n=1780)** | **New-Onset AF**  **(n=105)** | **Existing AF/non-AF**  **(n=1675)** | **p-value** |
| **Culprit vessel territory**  LM/LAD  Others | 657 (36.9)  1123 (63.1) | 34 (32.4)  71 (67.6) | 623 (37.2)  1052 (62.8) | 0.349 |
| Gp2b3a Inhibitors | 474 (26.6) | 35 (33.3) | 439 (26.2) | 0.109 |
| Thrombectomy | 697 (39.2) | 37 (35.2) | 660 (34.9) | 0.396 |
| Balloon Angioplasty | 1665 (93.5) | 97 (92.4) | 1568 (93.6) | 0.619 |
| Coronary Stenting | 1529 (85.9) | 88 (83.8) | 1441 (86.0) | 0.526 |
| **Post-procedure TIMI 3** | **1691 (95.0)** | **94 (89.5)** | **1597 (95.3)** | **0.008** |
| Residual Thrombus | 15 (0.8) | 1 (1.0) | 14 (0.8) | 0.600 |

Continuous variables are presented as mean±SD and categorical variables presented as number (%)

Glycoprotein 2b3a, Gp2b3a; LAD, left anterior descending; LM, left main; PPCI, primary percutaneous coronary intervention; PCI, percutaneous coronary intervention; STEMI, ST elevation myocardial infarction.

| **Table S2:** Univariate Cox regression for development of individual endpoints for patient with new-onset AF | | | |
| --- | --- | --- | --- |
| **Variable** | **HR** | **95% CI** | **p-value** |
| MACE | 1.002 | 0.732-1.373 | 0.990 |
| MI | 2.748 | 0.975-7.744 | 0.056 |
| HF | 0.879 | 0.479-1.613 | 0.678 |
| Stroke | 1.290 | 0.386-4.310 | 0.679 |
| Bleeding | 0.863 | 0.373-1.996 | 0.731 |
| CV mortality | 0.982 | 0.620-1.553 | 0.936 |
| All-cause mortality | 0.813 | 0.558-1.185 | 0.282 |


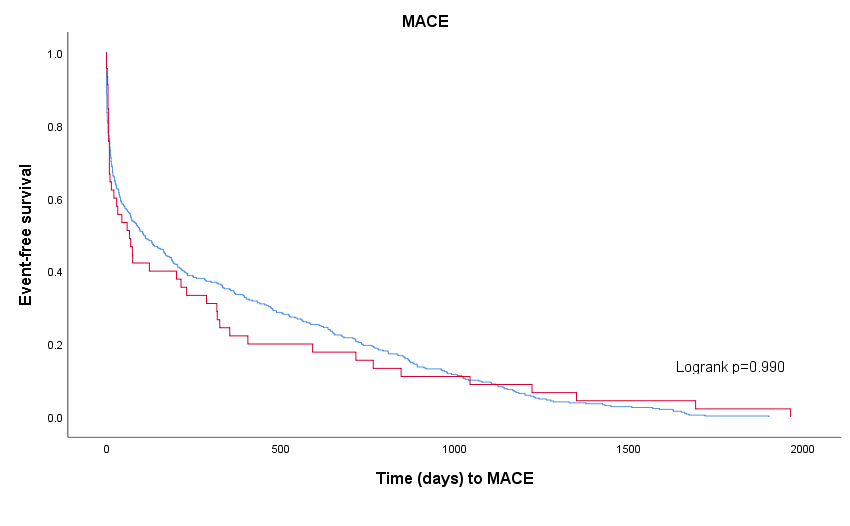

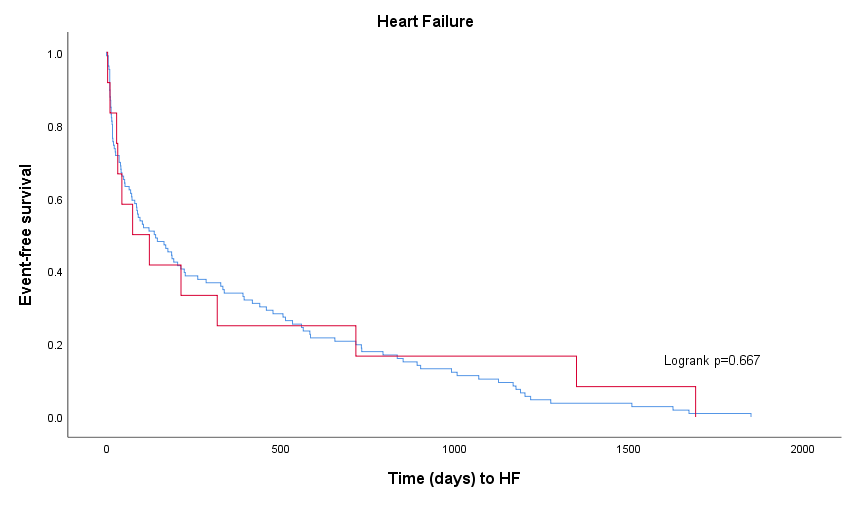


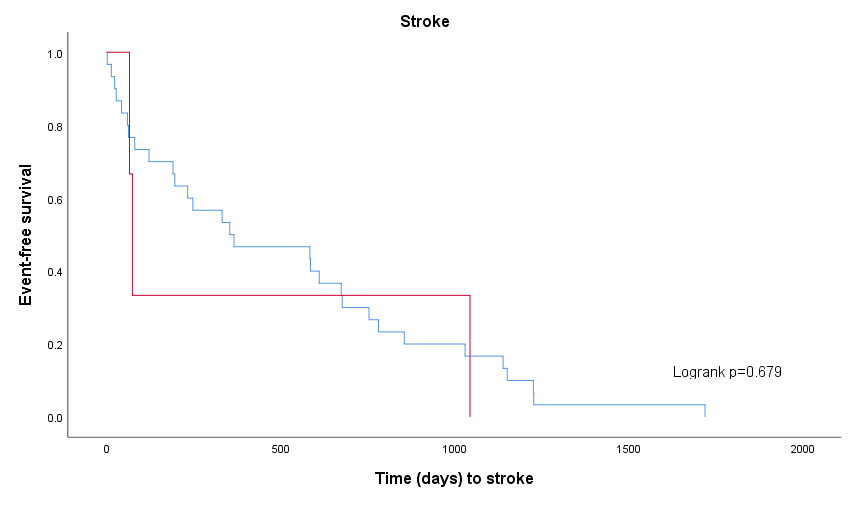


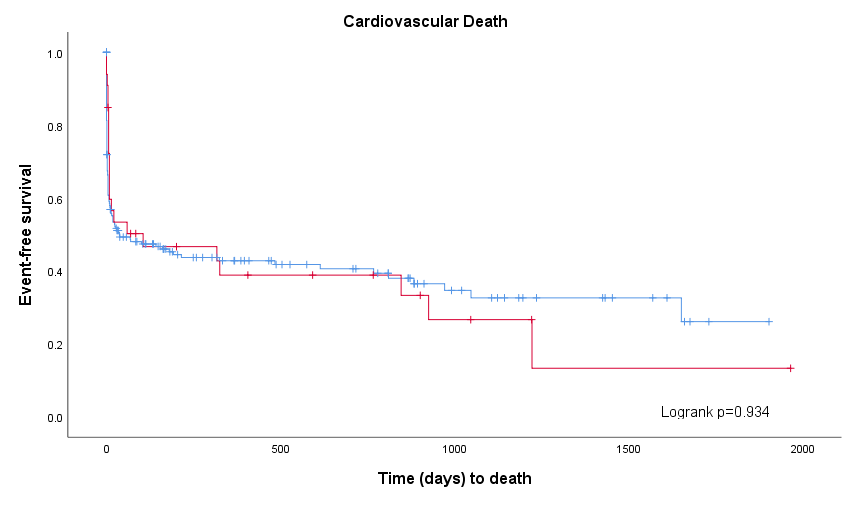


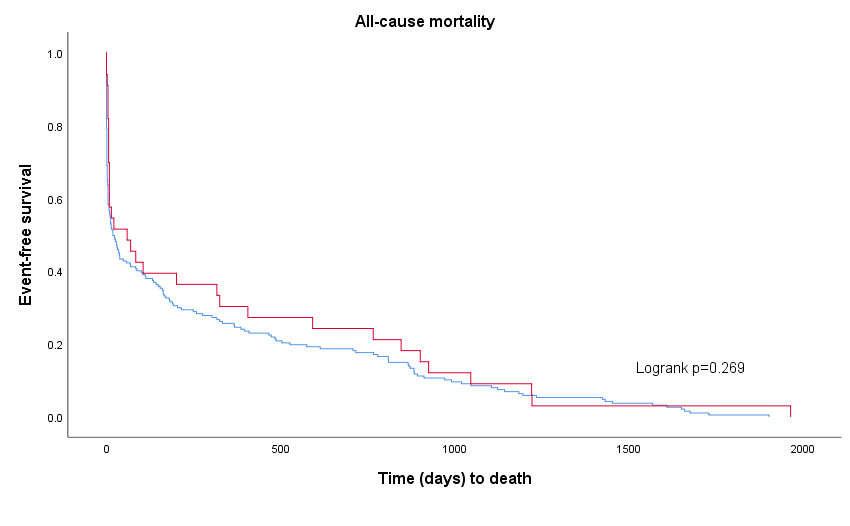


Figure S1: Kaplan-Meier curves of event-free survival for of a) MACE, b) heart failure and c) stroke, d) cardiovascular death and e) all-cause mortality between AF (red) and non-AF (blue) groups.
